# Supplementary material
Source: Springer Nature journal article supplement (https://www.springermedizin.de/resource/supplementary/12955_2014_1423_MOESM1_ESM.pdf/9559480)

**Mapping Equation #1\***

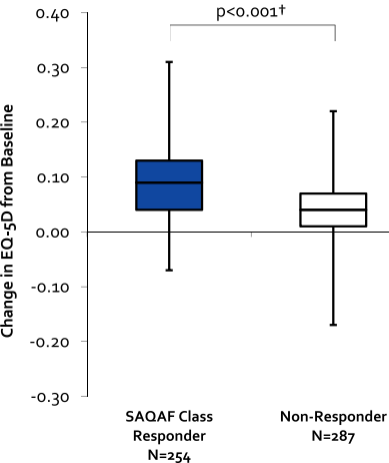

**Mapping Equation #2\***

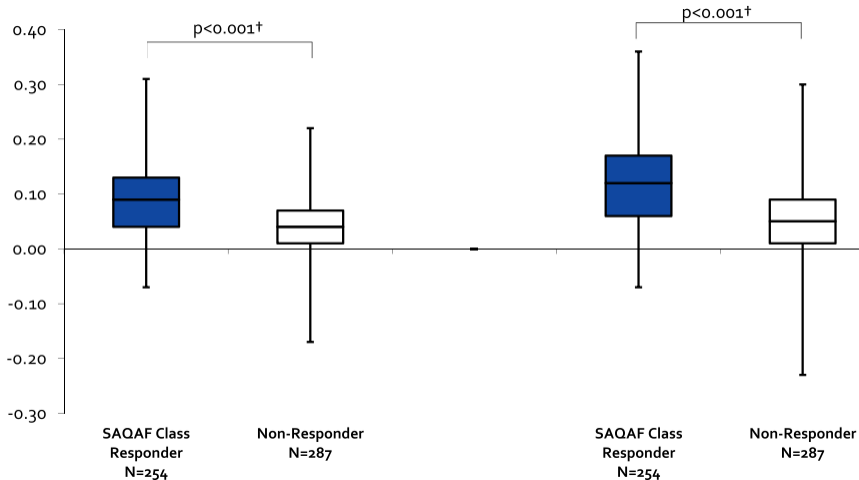

Supplement: MOESM1 [file 9559480]
